# Supplementary material for: Serum Axl predicts histology-based response to induction therapy and long-term renal outcome in lupus nephritis
Source: PubMed Central journal article supplement (PMC6370217; doi:10.1371/journal.pone.0212068), 2019-02-11
Supplement: pone.0212068.s003.pdf [file pone.0212068.s003.pdf]

**S1 Table.** Baseline sAxl levels in relation to histological response.

---

| Baseline variables                  | Coefficient | OR (95% CI)        | P-value      |
|-------------------------------------|-------------|--------------------|--------------|
| <b>sAxl levels (ng/mL)</b>          | 0.11        | 1.12 (1.01 – 1.23) | <b>0.025</b> |
| eGFR (mL/min/1.73 m <sup>2</sup> )  | 0.04        | 1.04 (0.99 – 1.10) | 0.153        |
| 24-h U-albumin (g)                  | -0.03       | 0.97 (0.55 – 1.71) | 0.916        |
| <b>Renal Activity Index</b>         | -0.13       | 0.88 (0.64 – 1.20) | 0.416        |
| <b>Renal Chronicity Index</b>       | -0.21       | 0.81 (0.48 – 1.36) | 0.424        |
| <b>Prednisone eq. dose (mg/day)</b> | -0.05       | 0.96 (0.89 – 1.02) | 0.183        |

---

Results from multivariable logistic regression analysis.  
Statistically significant *P*-values are in bold.

Outcome: Histological response after completion of induction therapy. Patients showing ≥50% improvement in renal activity index scores in post-treatment compared to baseline biopsies were considered histological responders; all other patients were considered histological non-responders.

eGFR, estimated filtration rate; s, soluble; h, hour; U, urine; eq., equivalent; OR, odds ratio; CI, confidence interval.

---
