# Supplementary material for: Serum Axl predicts histology-based response to induction therapy and long-term renal outcome in lupus nephritis
Source: PubMed Central journal article supplement (PMC6370217; doi:10.1371/journal.pone.0212068), 2019-02-11
Supplement: pone.0212068.s004.pdf [file pone.0212068.s004.pdf]

**S2 Table.** Baseline sAxl levels  $\geq 36.6$  ng/mL in relation to histological response.

---

| Baseline variables                              | Coefficient | OR (95% CI)         | P-value      |
|-------------------------------------------------|-------------|---------------------|--------------|
| <b>sAxl levels <math>\geq 36.6</math> ng/mL</b> | 2.23        | 9.27 (1.41 – 60.84) | <b>0.020</b> |
| eGFR (mL/min/1.73 m <sup>2</sup> )              | 0.02        | 1.03 (0.97 – 1.08)  | 0.346        |
| 24-h U-albumin (g)                              | 0.05        | 1.05 (0.57 – 1.94)  | 0.886        |
| Renal Activity Index                            | -0.06       | 0.94 (0.71 – 1.26)  | 0.683        |
| Renal Chronicity Index                          | -0.17       | 0.84 (0.51 – 1.37)  | 0.489        |
| Prednisone eq. dose (mg/day)                    | -0.02       | 0.98 (0.93 – 1.04)  | 0.577        |

---

Results from multivariable logistic regression analysis.  
Statistically significant *P*-values are in bold.

Outcome: Histological response after completion of induction therapy. Patients showing  $\geq 50\%$  improvement in renal activity index scores in post-treatment compared to baseline biopsies were considered histological responders; all other patients were considered histological non-responders.

eGFR, estimated filtration rate; s, soluble; h, hour; U, urine; eq., equivalent; OR, odds ratio; CI, confidence interval.

---
