# Supplementary material for: Serum Axl predicts histology-based response to induction therapy and long-term renal outcome in lupus nephritis
Source: PubMed Central journal article supplement (PMC6370217; doi:10.1371/journal.pone.0212068), 2019-02-11
Supplement: pone.0212068.s005.pdf [file pone.0212068.s005.pdf]

**S3 Table.** Post-treatment sAxl levels in relation to long-term renal outcome.

---

| Post-treatment variables   | Coefficient | OR (95% CI)        | <i>P</i> -value |
|----------------------------|-------------|--------------------|-----------------|
| <b>sAxl levels</b> (ng/mL) | -0.08       | 0.92 (0.86 – 0.99) | <b>0.027</b>    |
| <b>24-h U-albumin</b> (g)  | 0.73        | 2.07 (0.66 – 6.46) | 0.211           |

---

Results from multivariable logistic regression analysis.  
Statistically significant *P*-values are in bold.

Outcome: Good long-term renal outcome, defined as creatinine concentrations  $\leq 88.4$   $\mu\text{mol/L}$  in conformity with the Euro-Lupus Nephritis Trial (ELNT).

s, soluble; h, hour; U, urine; OR, odds ratio; CI, confidence interval.

---
